# Supplementary material for: Evaluation of the Effect of Pressure-Controlled Ventilation-Volume Guaranteed Mode vs. Volume-Controlled Ventilation Mode on Atelectasis in Patients Undergoing Laparoscopic Surgery: A Randomized Controlled Clinical Trial
Source: MDPI journal article supplement (doi:10.3390/medicina59101783), 2023-10-07
Supplement: s1 [file s1]

| <b>Tablo S3. Analyse of ventilator parameters at different timepoints</b> |                            |                          |                           |                     |
|---------------------------------------------------------------------------|----------------------------|--------------------------|---------------------------|---------------------|
|                                                                           | T <sub>ind</sub><br>(n=31) | T <sub>5</sub><br>(n=31) | T <sub>PP</sub><br>(n=31) | p                   |
| PIP PCV                                                                   | 17,94±4,26                 | 18,42±3,67               | 21,26±3,46                | 0.002 <sup>*a</sup> |
| PIP VCV                                                                   | 20,52±5,74(18)             | 20,84±4,32(20)           | 22,97±3,84(24)            | 0.037 <sup>*b</sup> |
| Plateau<br>pressure PCV                                                   | 13,71±3,53(12)             | 14,09±3,01(13)           | 16,61±3,23(16)            | 0.001 <sup>*b</sup> |
| Plateau<br>pressure VCV                                                   | 17,29±4,89(16)             | 17,77±4,89(18)           | 19,71±4,28(19)            | 0.074 <sup>b</sup>  |
| Compliance<br>PCV                                                         | 48,87±15,37(52)            | 47,94±13,71(48)          | 35,64±6,90(35)            | 0.001 <sup>*b</sup> |
| Compliance<br>VCV                                                         | 42,09±12,22                | 40,68±13,91              | 30,77±5,73                | 0.001 <sup>*a</sup> |

<sup>a</sup> One-Way ANOVA test: values are given as mean ± standard deviation

<sup>b</sup> Kruskal Wallis H test: values are given as mean ± standard deviation ( median)

\*p<0.05 statistically significant difference among groups

| <b>Tablo S1. Detailed Regional Comparison of PCV in-group LUS Scores between Preoperative and Postoperative Measurements</b> |                        |                         |        |
|------------------------------------------------------------------------------------------------------------------------------|------------------------|-------------------------|--------|
|                                                                                                                              | Preoperative<br>(n=31) | Postoperative<br>(n=31) | p      |
| L1                                                                                                                           | 0,39±0,495(0,0)        | 0,61±0,615(1,0)         | 0.150  |
| L2                                                                                                                           | 0,48±0,57(0,0)         | 0,94±0,68(1,0)          | 0.008* |
| L3                                                                                                                           | 0,48±0,57(0,0)         | 0,74±0,63(1,0)          | 0.100  |
| L4                                                                                                                           | 0,65±0,55(1,0)         | 1,06±0,68(1,0)          | 0.013* |
| L5                                                                                                                           | 0,10±0,30(0,0)         | 0,39±0,495(0,0)         | 0.008* |
| L6                                                                                                                           | 0,10±0,30(0,0)         | 0,65±0,486(1,0)         | 0.001* |
| R1                                                                                                                           | 0,39±0,495(0,0)        | 0,65±0,61(1,0)          | 0.092  |
| R2                                                                                                                           | 0,71±0,59(1,0)         | 1,26±0,63(1,0)          | 0.001* |
| R3                                                                                                                           | 0,55±0,51(1,0)         | 0,90±0,70(1,0)          | 0.043* |
| R4                                                                                                                           | 0,87±0,72(1,0)         | 1,39±0,715(2,0)         | 0.007* |
| R5                                                                                                                           | 0,10±0,30(0,0)         | 0,52±0,57(0,0)          | 0.001* |
| R6                                                                                                                           | 0,19±0,40(0,0)         | 0,97±0,71(1,0)          | 0.001* |

<sup>d</sup> Mann Whitney U test: values are given as mean ± standard deviation (median)

\*p<0.05 statistically significant difference between groups

| <b>Tablo S2. Detailed Regional Comparison of VCV in-group LUS Scores between Preoperative and Postoperative Measurements</b> |                        |                         |        |
|------------------------------------------------------------------------------------------------------------------------------|------------------------|-------------------------|--------|
|                                                                                                                              | Preoperative<br>(n=31) | Postoperative<br>(n=31) | p      |
| L1                                                                                                                           | 0,26±0,51(0,0)         | 0,52±0,57(0,0)          | 0.043* |
| L2                                                                                                                           | 0,35±0,55(0,0)         | 0,77±0,62(1,0)          | 0.006* |

|    |                 |                 |        |
|----|-----------------|-----------------|--------|
| L3 | 0,32±0,475(0,0) | 0,71±0,59(1,0)  | 0.008* |
| L4 | 0,71±0,59(1,0)  | 1,0±0,73(1,0)   | 0.114  |
| L5 | 0,06±0,25(0,0)  | 0,48±0,57(0,0)  | 0.001* |
| L6 | 0,26±0,73(0,0)  | 0,97±0,795(1,0) | 0.001* |
| R1 | 0,23±0,425(0,0) | 0,58±0,67(0,0)  | 0.024* |
| R2 | 0,39±0,615(0,0) | 1,39±0,67(1,0)  | 0.001* |
| R3 | 0,39±0,56(0,0)  | 0,94±0,57(1,0)  | 0.001* |
| R4 | 0,74±0,575(1,0) | 1,55±0,77(2,0)  | 0.001* |
| R5 | 0,03±0,18(0,0)  | 0,71±0,59(1,0)  | 0.001* |
| R6 | 0,13±0,43(0,0)  | 1,19±0,70(1,0)  | 0.001* |

<sup>d</sup> Mann Whitney U test: values are given as mean ± standard deviation

(median)

\*p<0.05 Gruplar arası istatistiksel olarak anlamlı fark
